# Supplementary material for: Redox Chemistry of the Subphases of α-CsPbI2Br and β-CsPbI2Br: Theory Reveals New Potential for Photostability
Source: Nanomaterials (Basel). 2023 Jan 9;13(2):276. doi: 10.3390/nano13020276 (PMC9862745; doi:10.3390/nano13020276)
Supplement: Supplementary file 1 [file nanomaterials-13-00276-s001.zip › nanomaterials-2151481-supplementary.pdf]

# Redox Chemistry of the Subphases of $\alpha$ -CsPbI<sub>2</sub>Br and $\beta$ -CsPbI<sub>2</sub>Br: Theory Reveals New Potential for Photostability

Lavrenty Gennady Gutsev <sup>1,2,\*</sup>, Sean Nations <sup>1</sup>, Bala Ramu Ramachandran <sup>1</sup>, Gennady Lavrenty Gutsev <sup>3</sup>, Shengnian Wang <sup>1</sup>, Sergei Aldoshin <sup>2</sup> and Yuhua Duan <sup>4</sup>

<sup>1</sup> Institute for Micromanufacturing, Louisiana Tech University, Ruston, LA 71272, USA

<sup>2</sup> Federal Research Center for Problems of Chemical Physics and Medicinal Chemistry of RAS, Semenov Prospect 1, Chernogolovka 142432, Russia

<sup>3</sup> Department of Physics, Florida A&M University, Tallahassee, FL 32307, USA

<sup>4</sup> National Energy Technology Laboratory, United States Department of Energy, Pittsburgh, PA 15236, USA

\* Correspondence: lgutsev@latech.edu

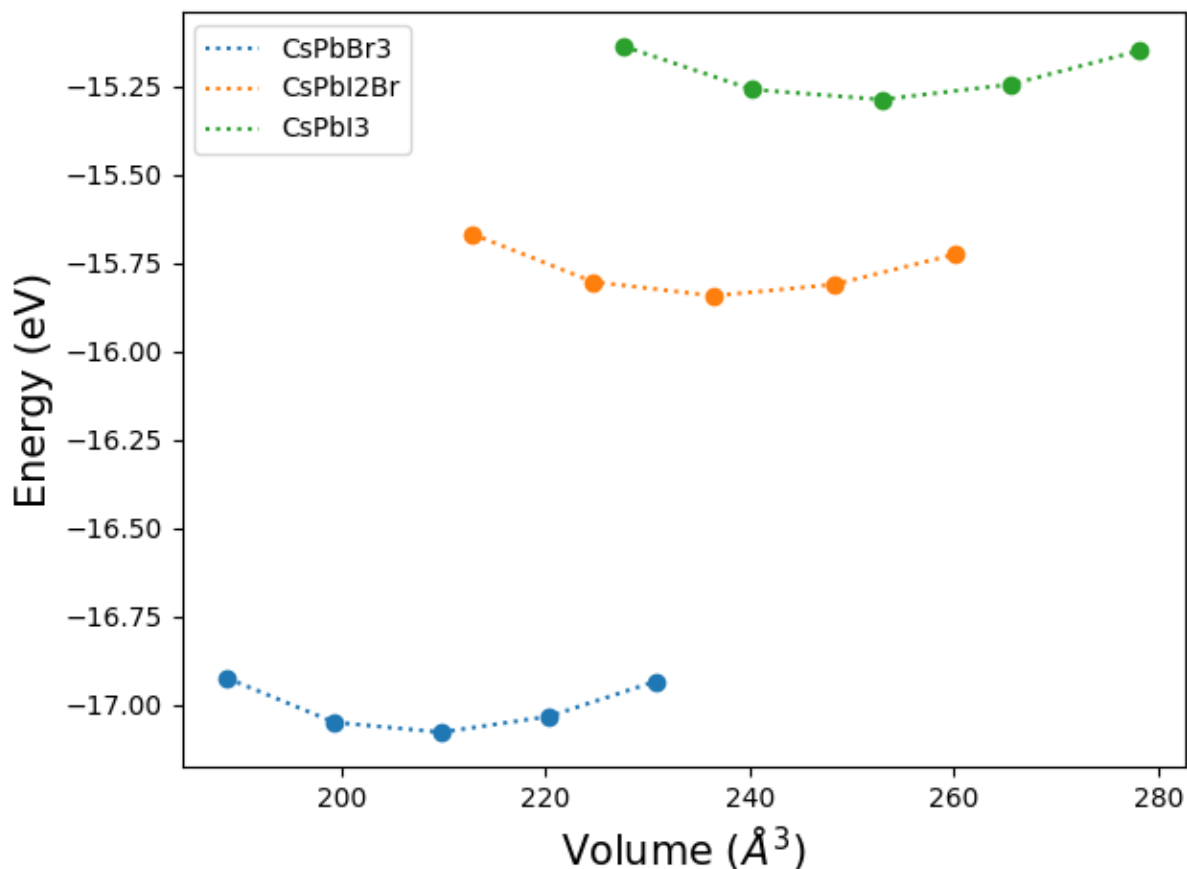

Figure S1. Energy versus volume (EV) curves for  $\alpha$ -CsPbI<sub>3</sub>,  $\alpha$ -CsPbI<sub>2</sub>Br and  $\alpha$ -CsPbBr<sub>3</sub>.

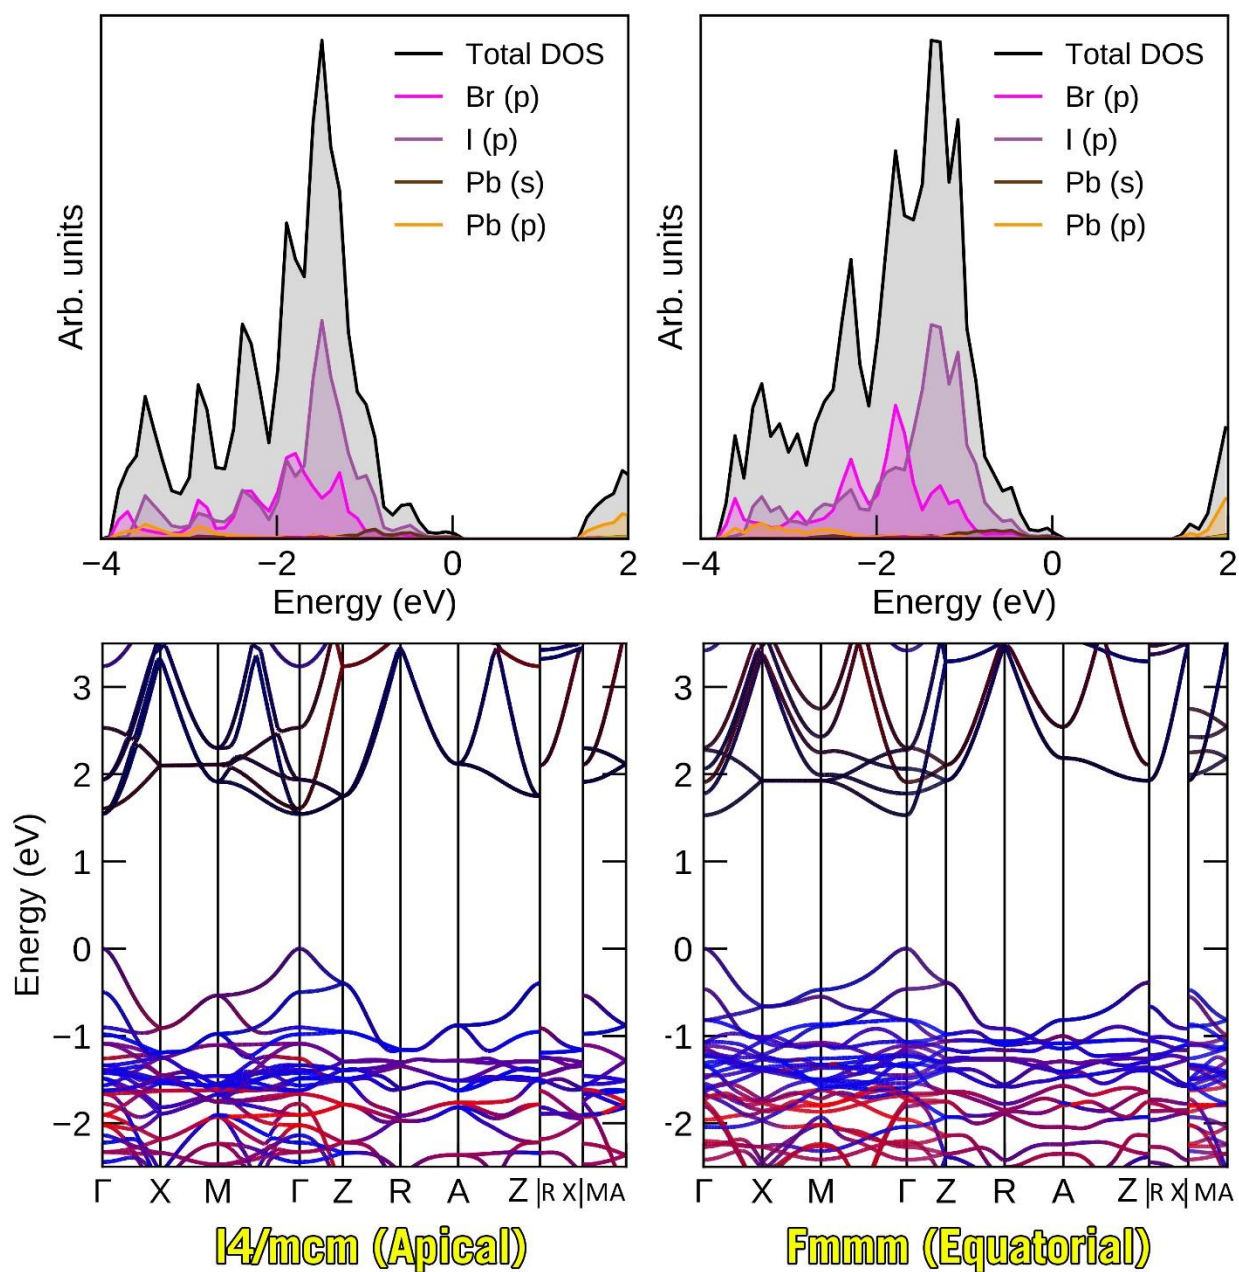

Figure S2. The partial Density of States and band structure of  $\beta$ -CsPbI<sub>2</sub>Br *I4/mcm* (apical, left) and  $\beta$ -CsPbI<sub>2</sub>Br *Fmmm* (equatorial). The bromine-based contributions to band structure are in red, iodine in blue. The “darkness” of the conduction band is explained by its majority Pb-p character.

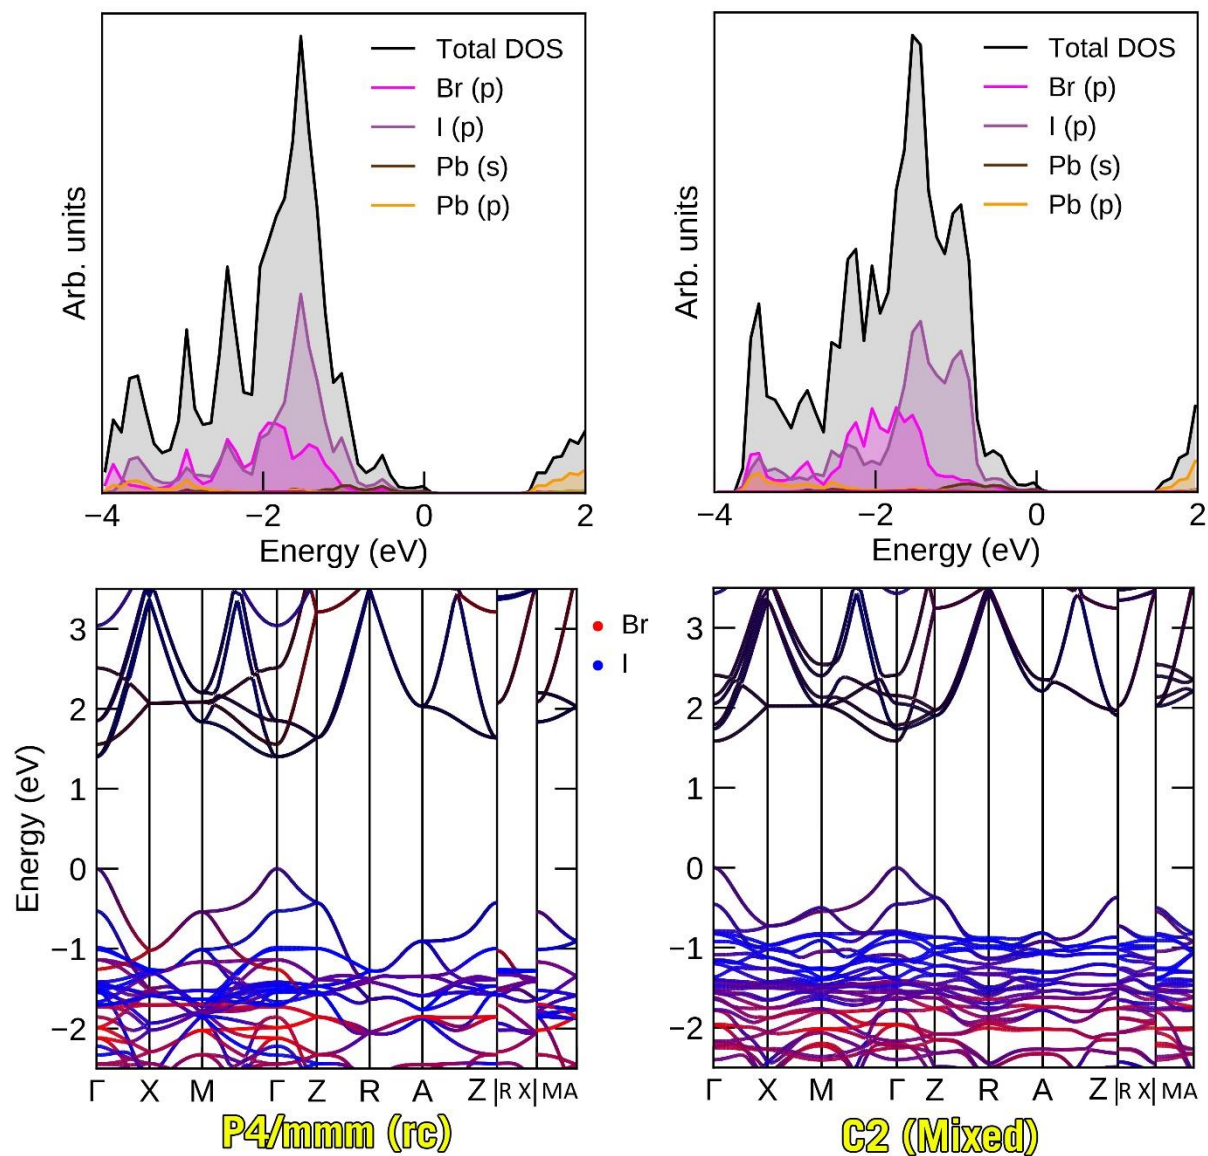

Figure S3. The partial Density of States and band structure of  $\alpha$ -CsPbI<sub>3</sub> *P4/mmm* (rotated coordinates, left) and  $\beta$ -CsPbI<sub>2</sub>Br *C2*(mixed). The bromine-based contributions to band structure are in red, iodine in blue. The “darkness” of the conduction band is explained by its majority Pb-p character.

$$x_{\text{Br}}=0$$

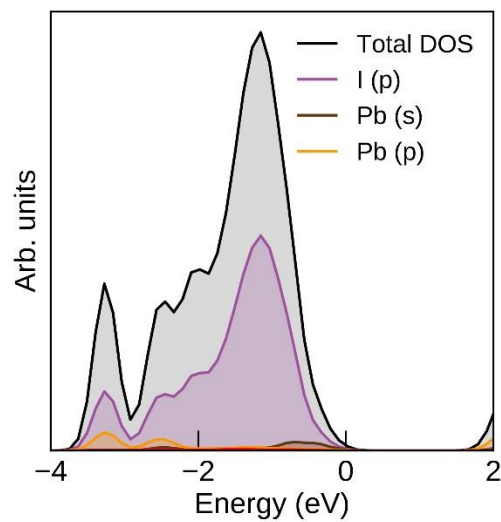

$$x_{\text{Br}}=1/6$$

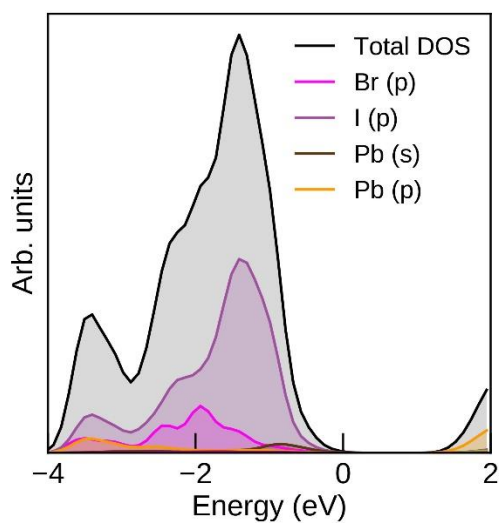

$$x_{\text{Br}}=1/3$$

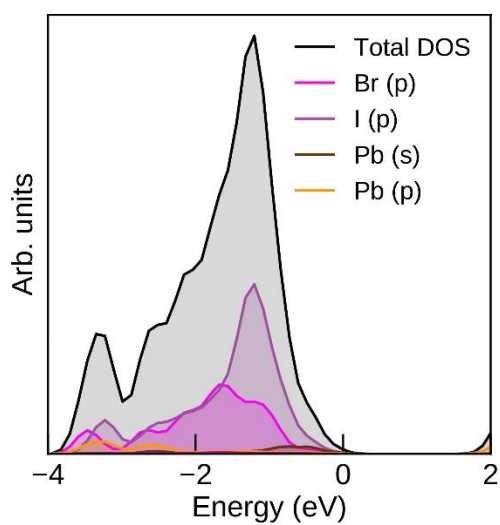

Figure S4. The partial Density of States of  $\alpha\text{-CsPb}(\text{I}_{1-x}\text{Br}_x)_3$   $x=0,1/3,1/6$

$$x_{\text{Br}}=1/2$$

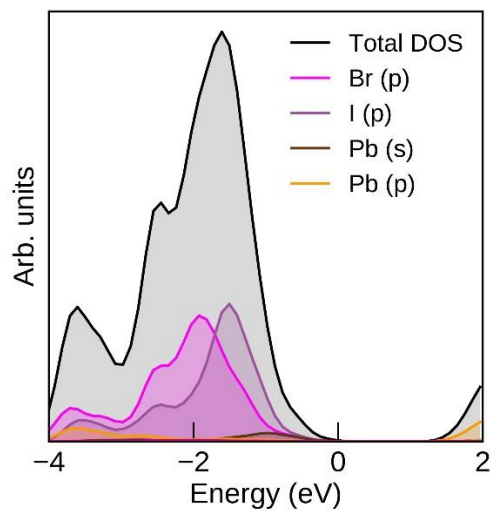

$$x_{\text{Br}}=2/3$$

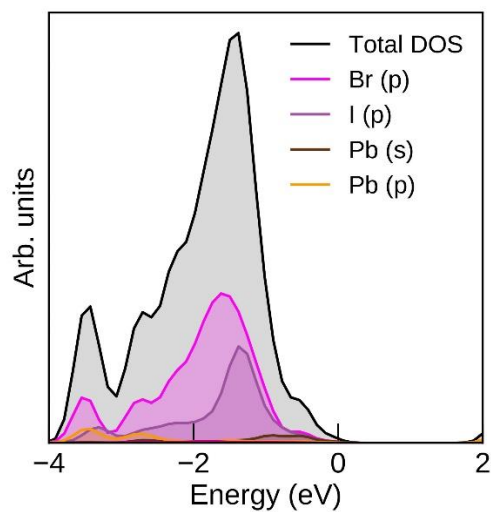

$$x_{\text{Br}}=5/6$$

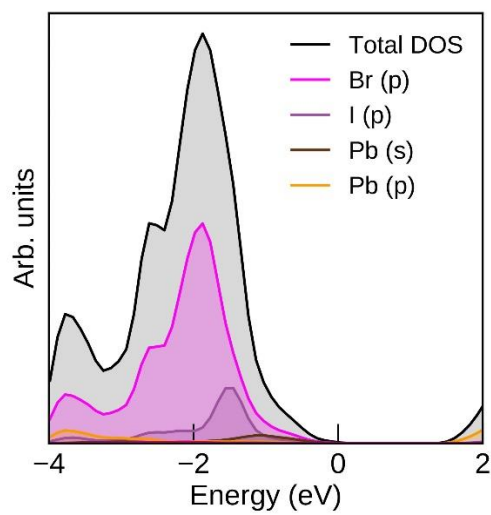

Figure S5. The partial Density of States of  $\alpha\text{-CsPb}(\text{I}_{1-x}\text{Br}_x)_3$   $x=1/2, 2/3, 5/6$

$$x_{\text{Br}}=0$$

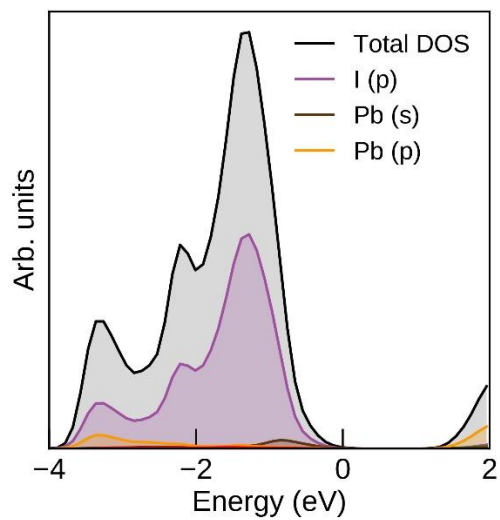

$$x_{\text{Br}}=1/6$$

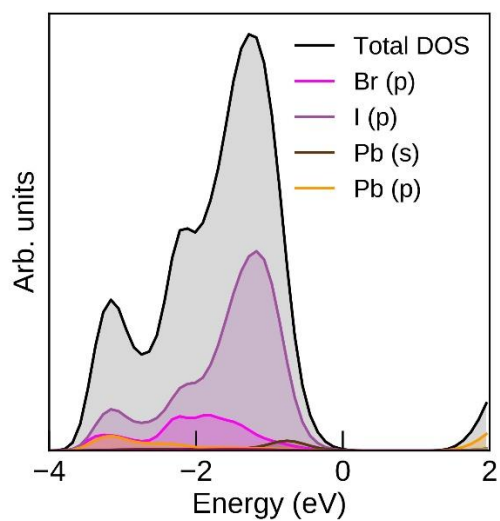

$$x_{\text{Br}}=1/3$$

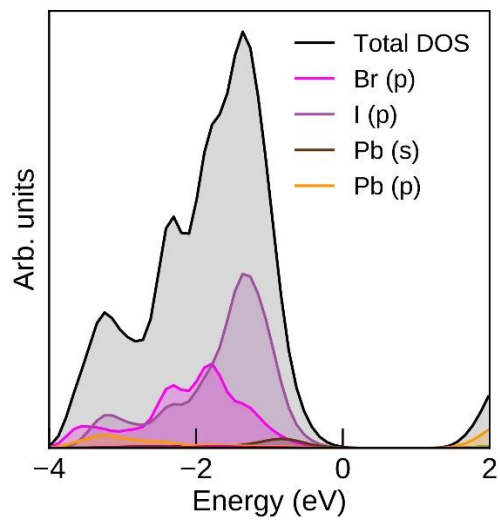

Figure S6. The partial Density of States of  $\beta$ -CsPb(I<sub>1-x</sub>Br<sub>x</sub>)<sub>3</sub>  $x=0,1/3,1/6$

$$x_{\text{Br}}=1/2$$

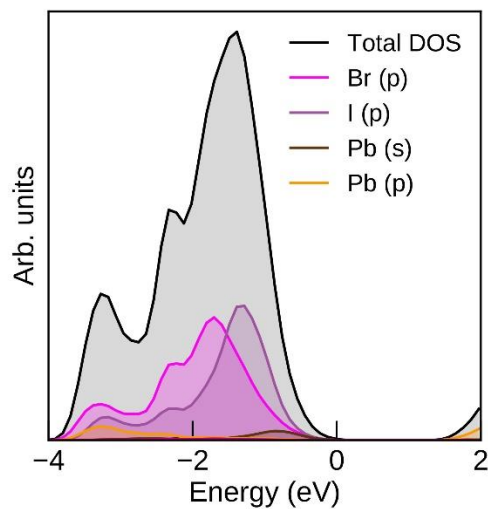

$$x_{\text{Br}}=2/3$$

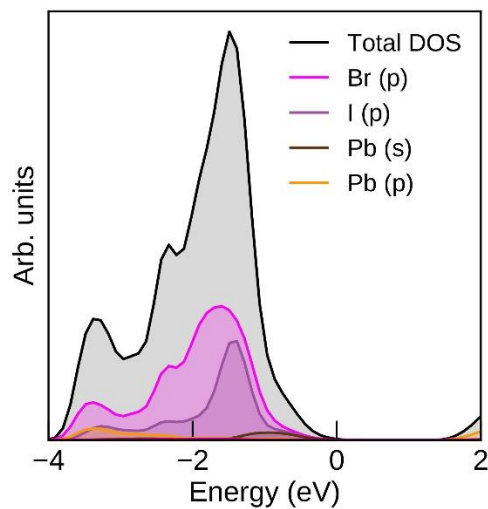

$$x_{\text{Br}}=5/6$$

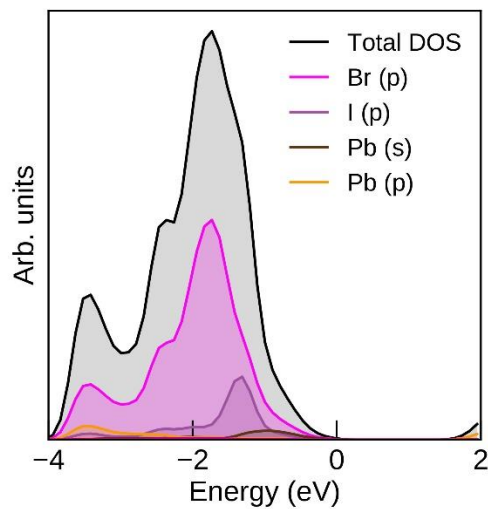

Figure S7. The partial Density of States of  $\beta$ -CsPb(I<sub>1-x</sub>Br<sub>x</sub>)<sub>3</sub>  $x=1/2, 2/3, 5/6$

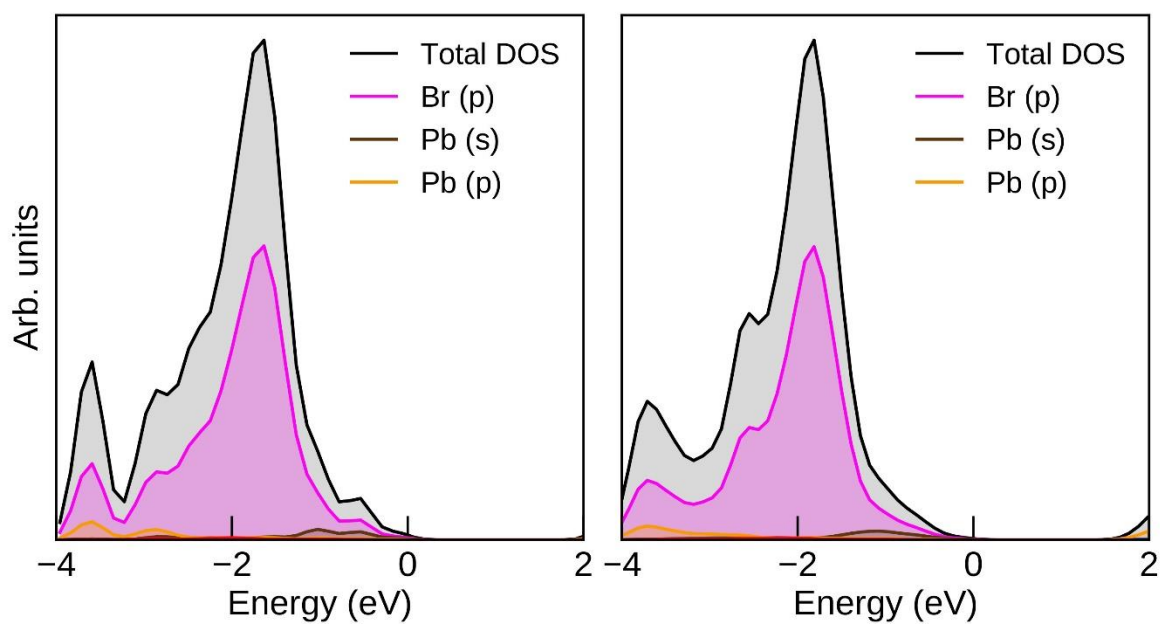

Figure S8. The partial Density of States of  $\alpha$ -CsPbBr<sub>3</sub> (left) and  $\beta$ -CsPbBr<sub>3</sub> (right)

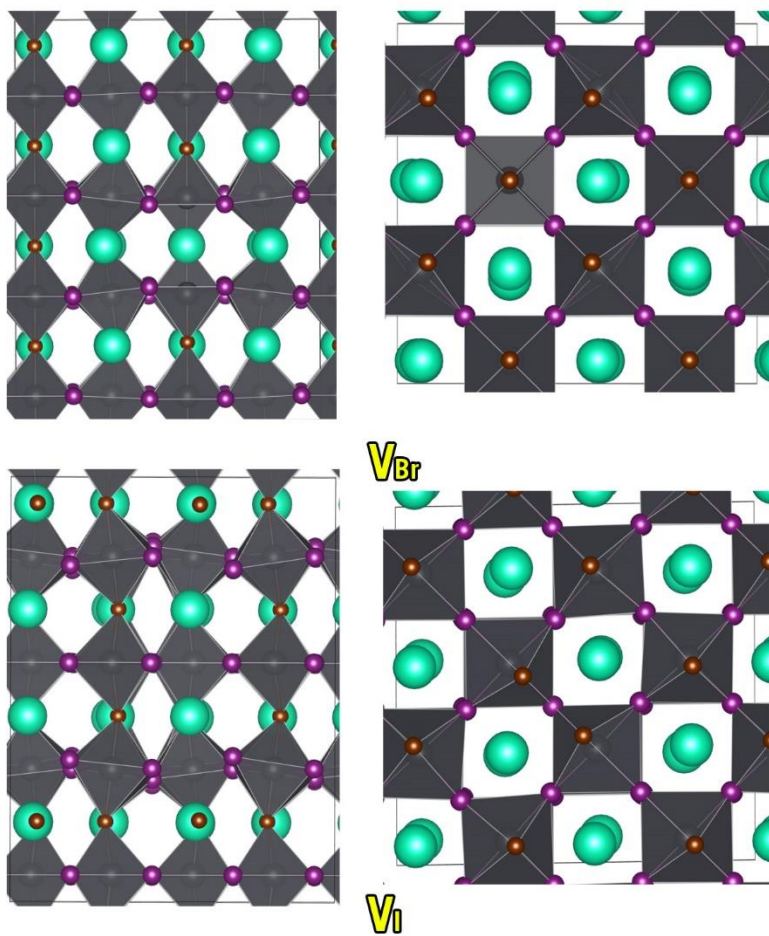

Figure S9 The geometrical distortions caused by bromine and iodine vacancies in  $\alpha$ -CsPbI<sub>2</sub>Br  $P4/mmm$
